# Supplementary material for: A cleaved METTL3 potentiates the METTL3–WTAP interaction and breast cancer progression
Source: eLife journal article supplement (doi:10.7554/elife.87283), 2023-05-10

**Figure 5-source data 1:** Unedited western blot pictures for figure 5.

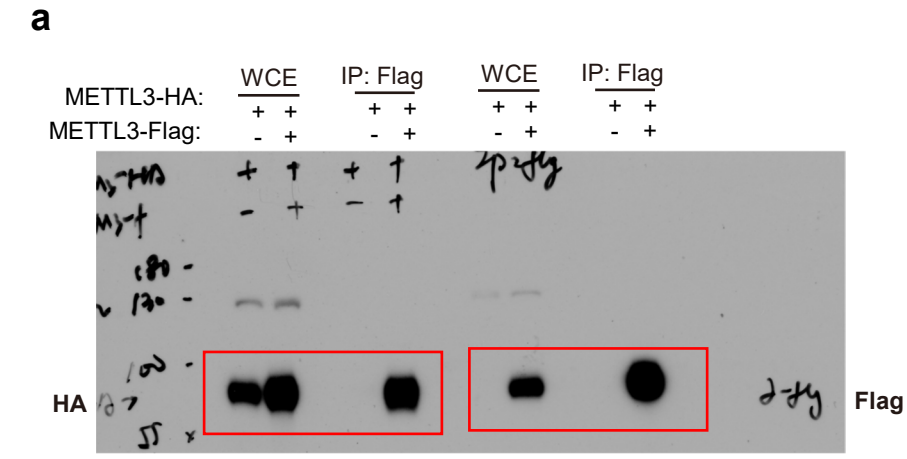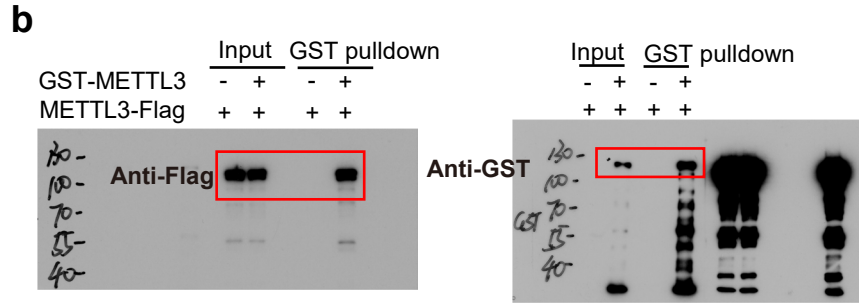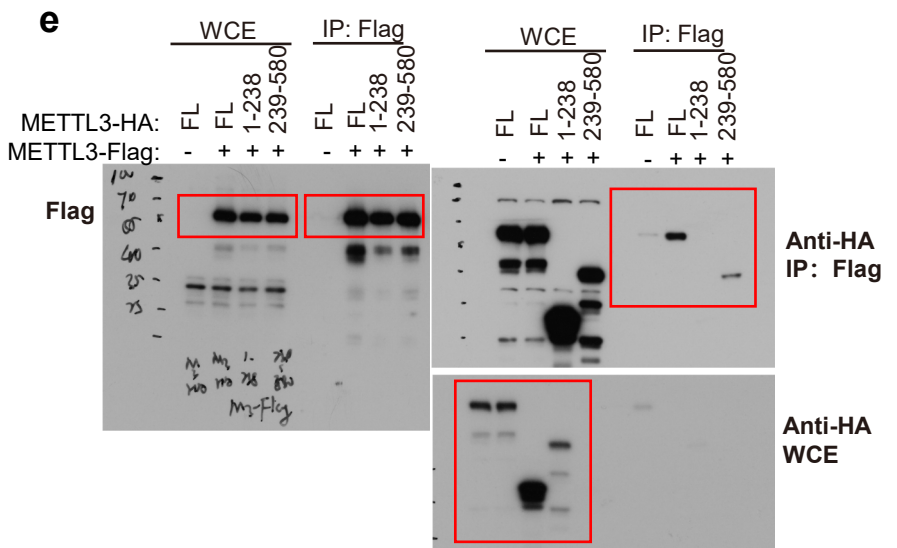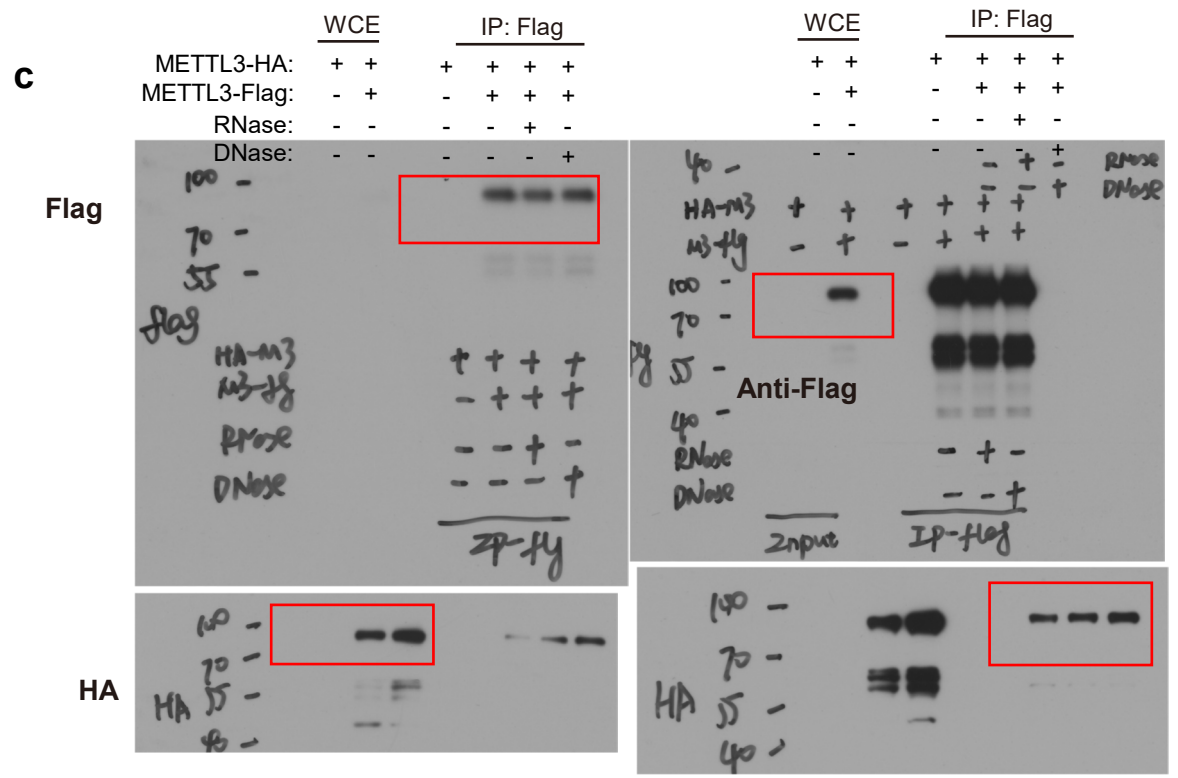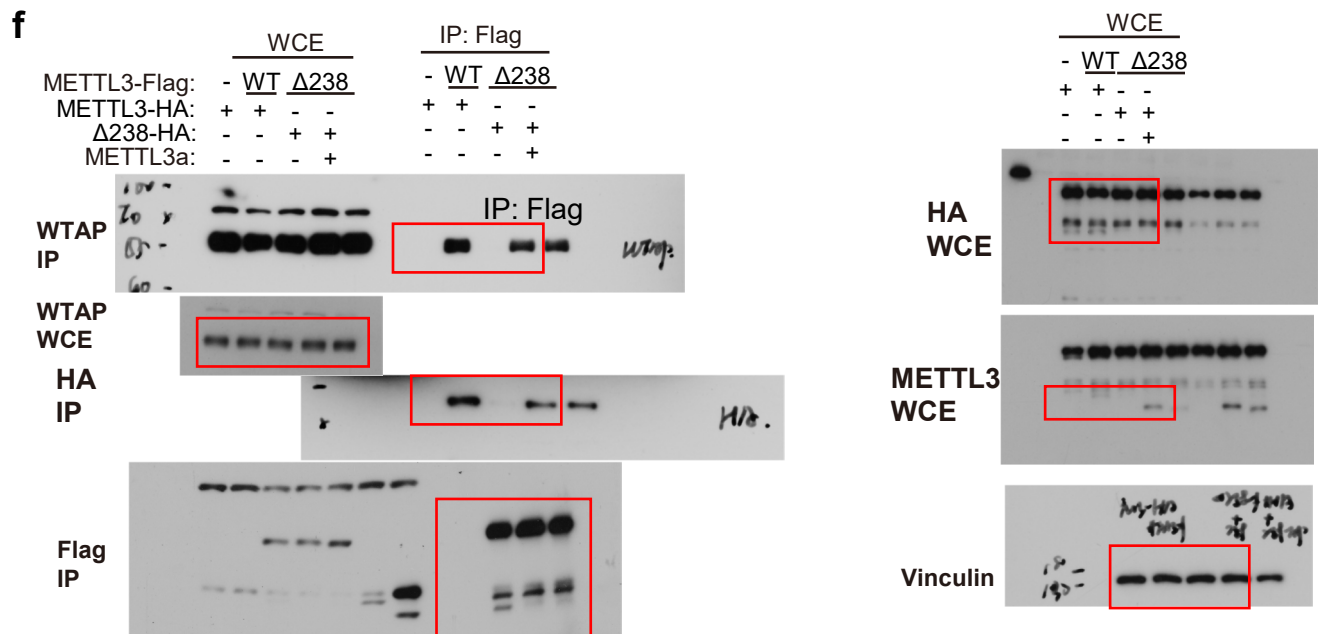

**g**

|               | WCE |   |   | IP: Flag |   |   |
|---------------|-----|---|---|----------|---|---|
| METTL14-HA:   | +   | + | + | +        | + | + |
| METTL14-Flag: | -   | + | + | -        | + | + |
| shMETTL3:     | -   | - | + | -        | - | + |

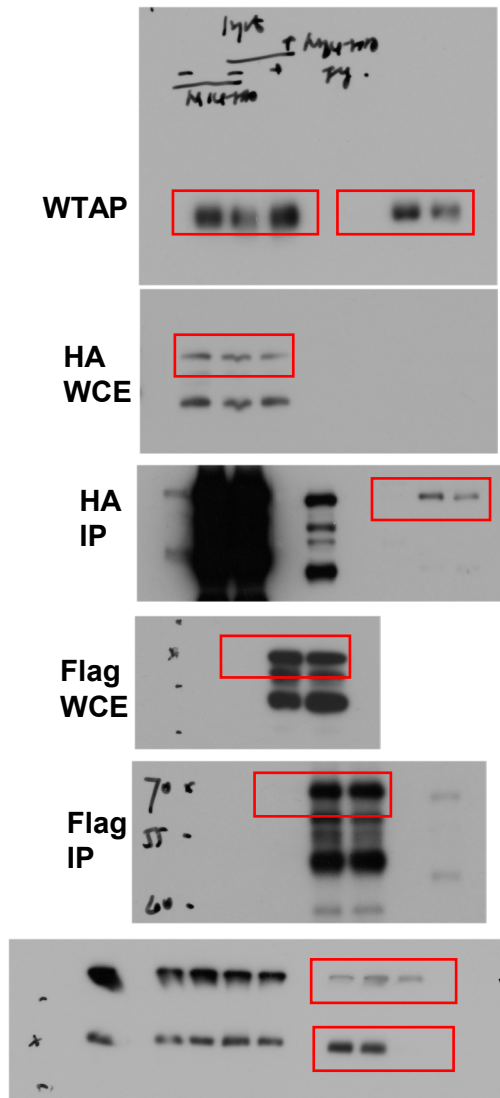**h**

|              | WCE |   |   | IP: Flag |   |   |
|--------------|-----|---|---|----------|---|---|
| METTL3-HA:   | +   | + | + | +        | + | + |
| METTL3-Flag: | -   | + | + | -        | + | + |
| shMETTL14:   | -   | - | + | -        | - | + |

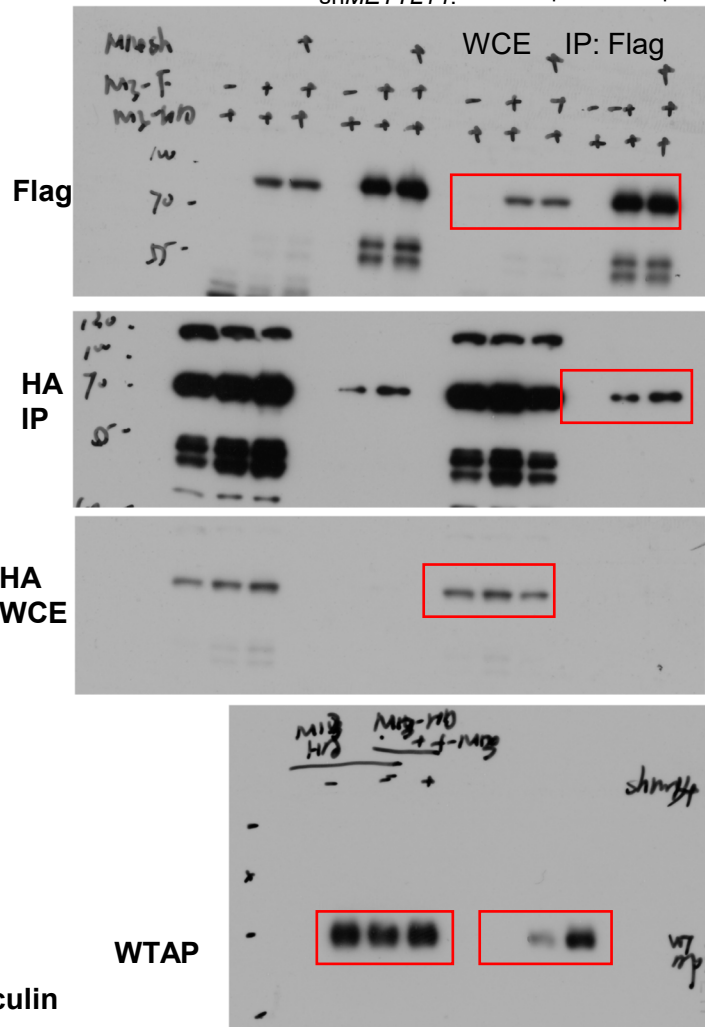**i**

|            | WCE |   |   | IP: Flag |   |   |
|------------|-----|---|---|----------|---|---|
| GFP-WTAP:  | +   | + | + | +        | + | + |
| Flag-WTAP: | -   | + | + | -        | + | + |
| shMETTL3:  | -   | - | + | -        | - | + |

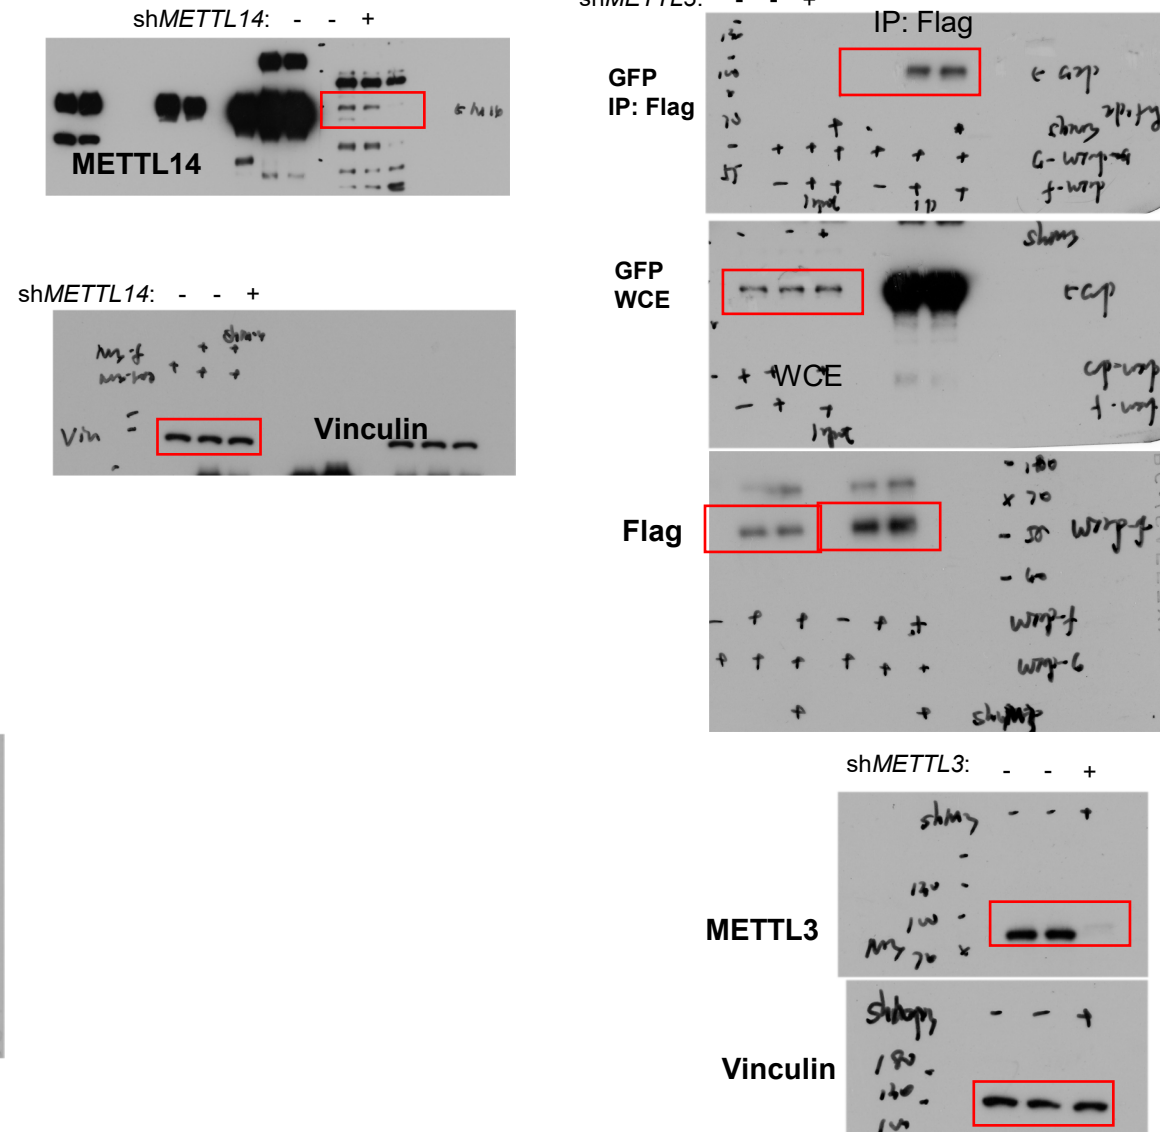

**j**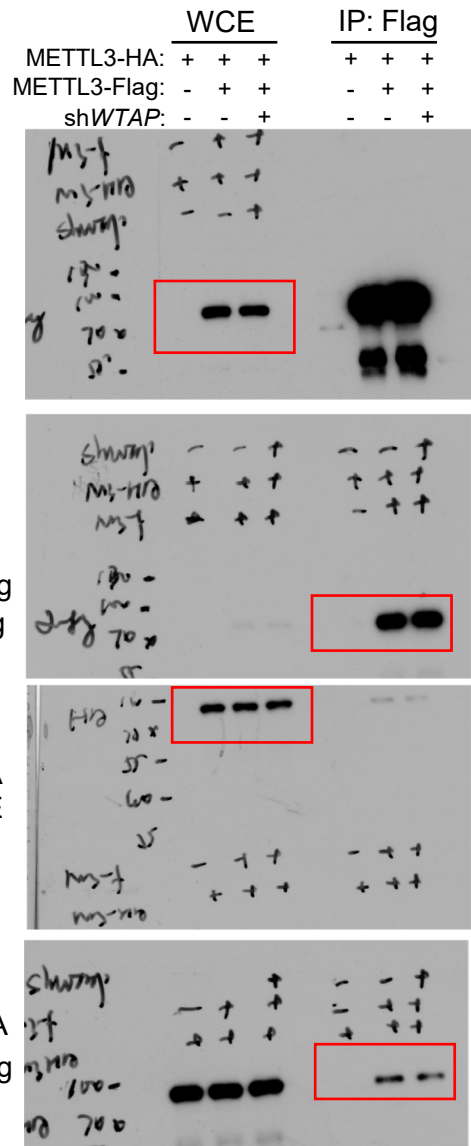**k**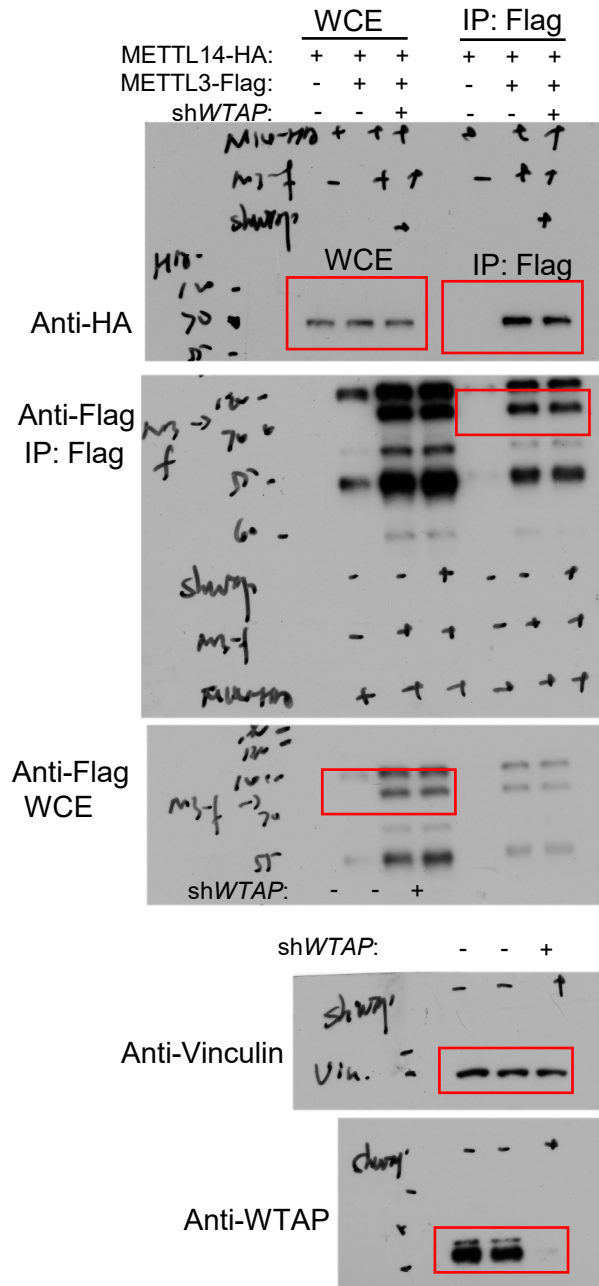**l**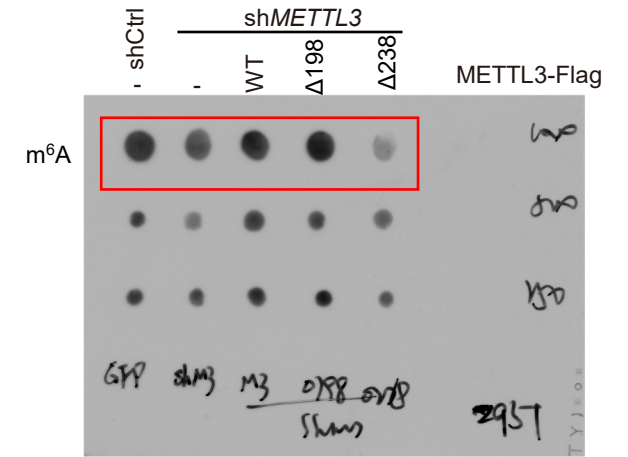**n**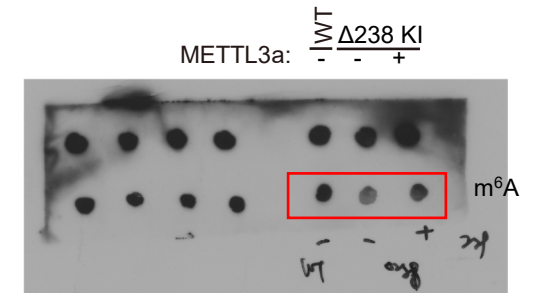

Supplement: fig5-data1 [file elife-87283-fig5-data1-v1.pdf]
