# Supplementary material for: A cleaved METTL3 potentiates the METTL3–WTAP interaction and breast cancer progression
Source: PubMed Central journal article supplement (PMC10435237; doi:10.7554/elife.87283), 2023-08-17

**Figure 2-source data-1:** Unedited western blot pictures for figure 2.

**b**

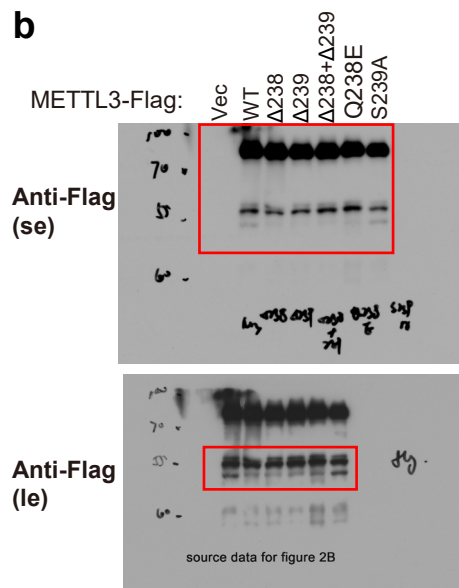

**d**

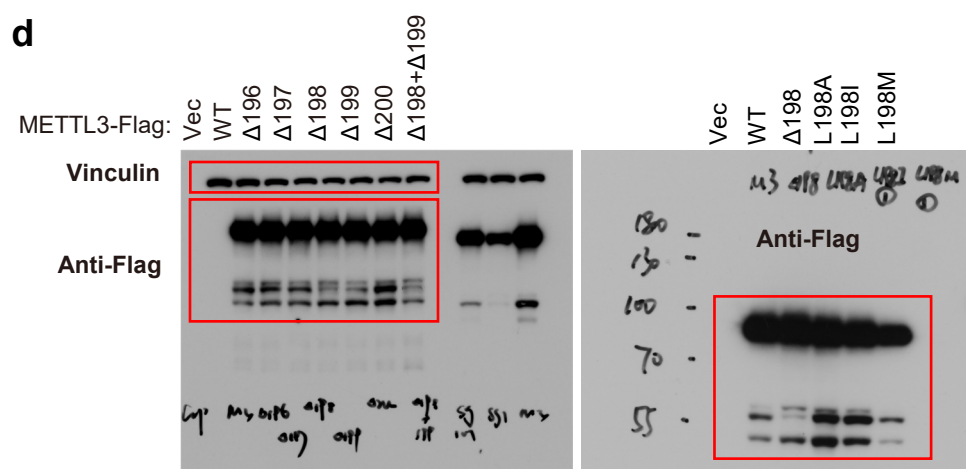

**e**

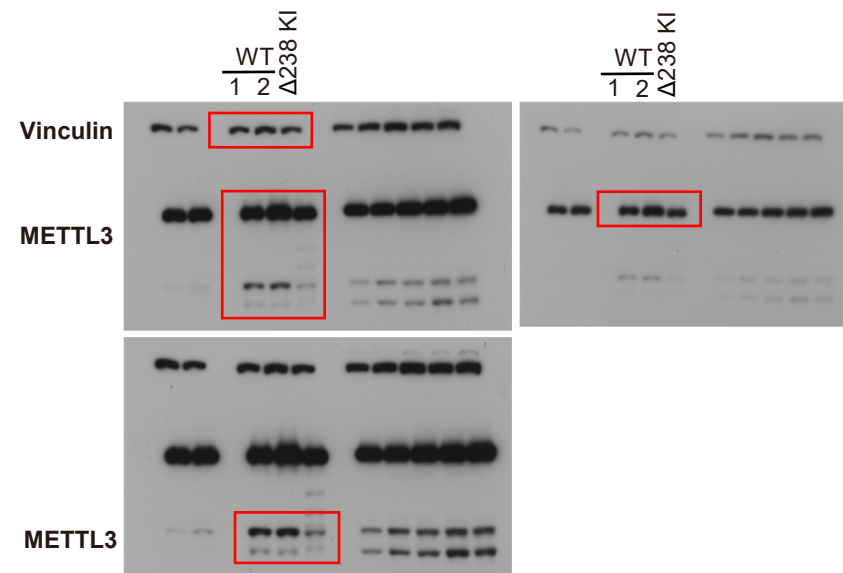

**f**

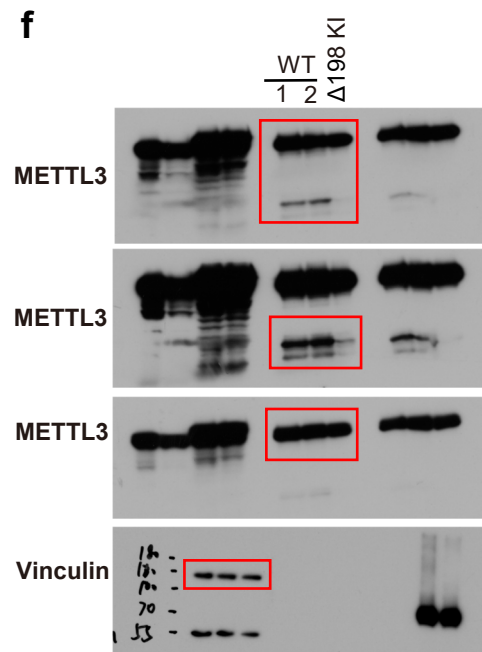

**g**

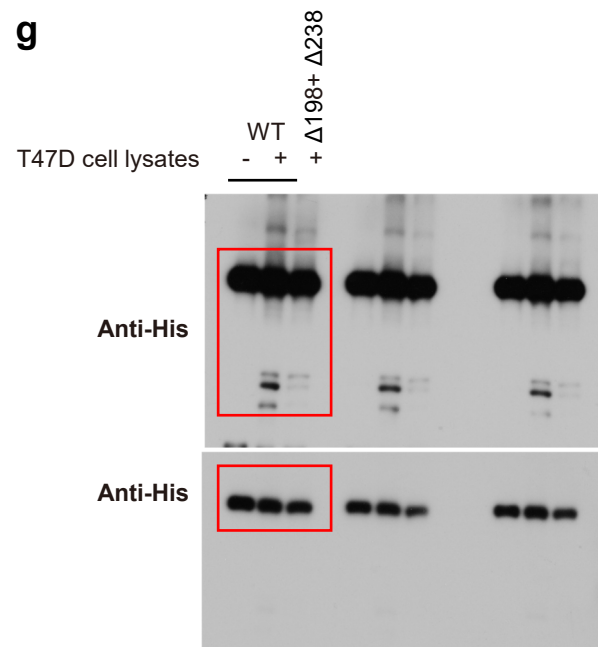

**h**

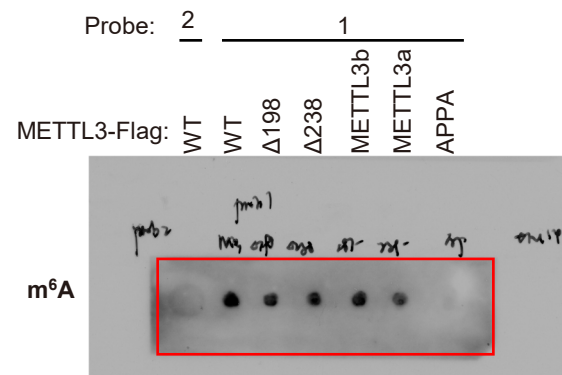

**j**

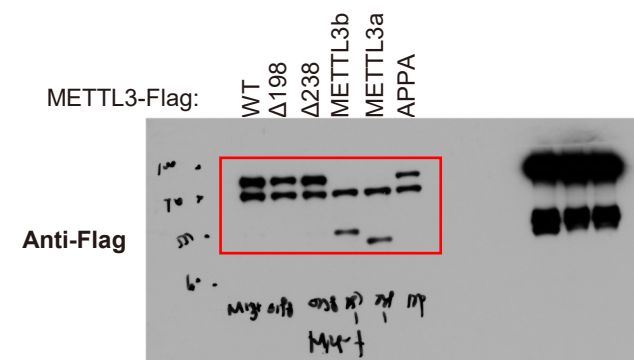

Supplement: elife-87283-fig2-data1.pdf [file elife-87283-fig2-data1.pdf]
