# Supplementary material for: A cleaved METTL3 potentiates the METTL3–WTAP interaction and breast cancer progression
Source: PubMed Central journal article supplement (PMC10435237; doi:10.7554/elife.87283), 2023-08-17

**Figure 5-Figure supplement 1-source data:** Unedited western blot pictures for Figure 1-figure supplement 1.

**a**

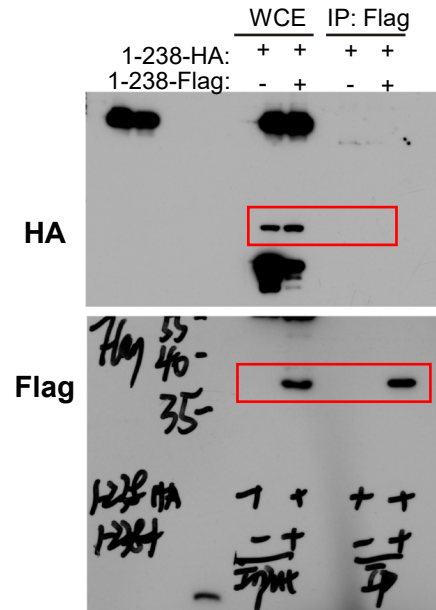

**b**

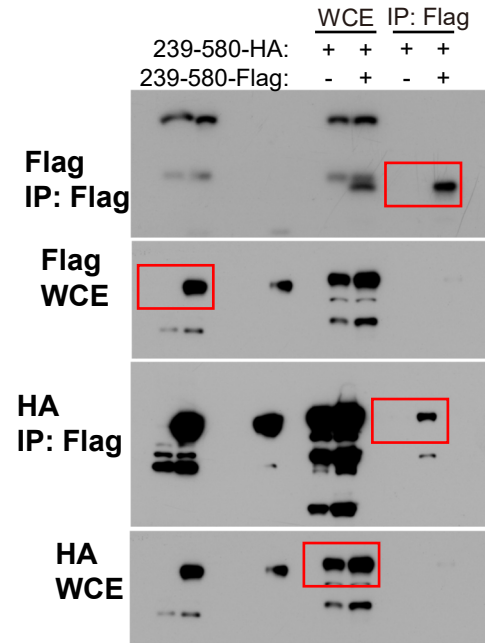

**c**

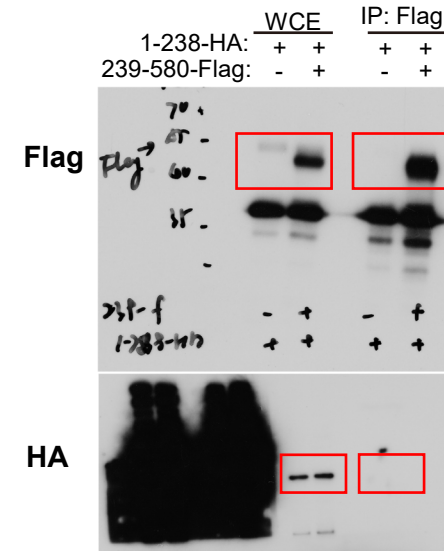

**d**

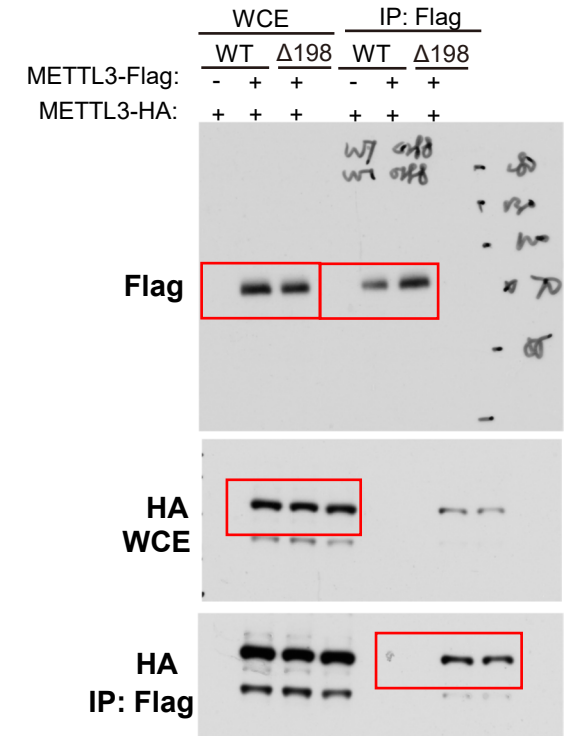

Supplement: elife-87283-fig5-figsupp1-data1.pdf [file elife-87283-fig5-figsupp1-data1.pdf]
