# Supplementary material for: A cleaved METTL3 potentiates the METTL3–WTAP interaction and breast cancer progression
Source: PubMed Central journal article supplement (PMC10435237; doi:10.7554/elife.87283), 2023-08-17

**Figure 6-Figure supplement 1: Unedited western blot pictures for Figure 6-figure supplement 1.**

**d**

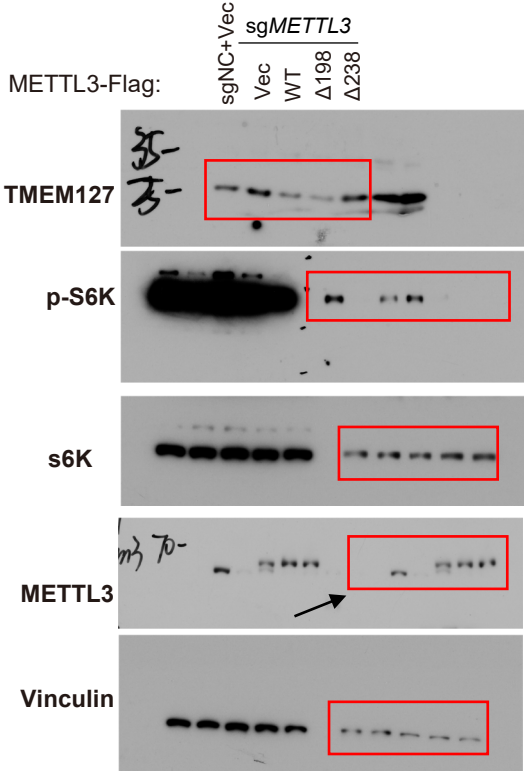

Supplement: elife-87283-fig6-figsupp1-data1.pdf [file elife-87283-fig6-figsupp1-data1.pdf]
