# Supplementary material for: A cleaved METTL3 potentiates the METTL3–WTAP interaction and breast cancer progression
Source: PubMed Central journal article supplement (PMC10435237; doi:10.7554/elife.87283), 2023-08-17

**Figure 7-source data:** Unedited western blot pictures for figure 7.

**a**

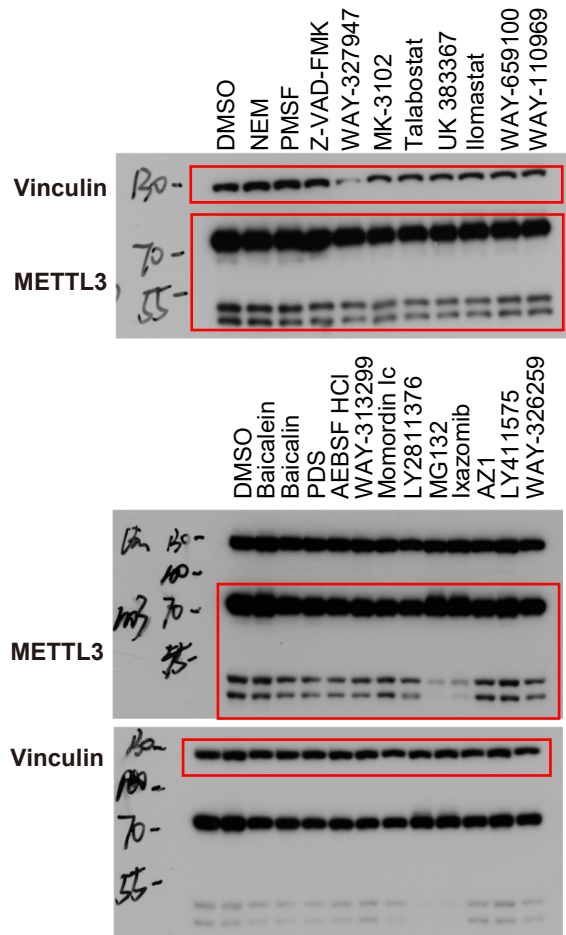

**b**

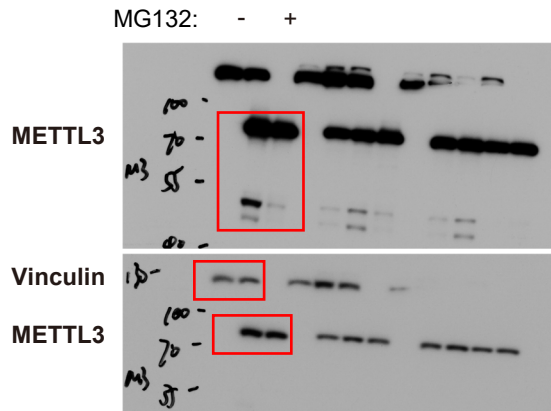

**c**

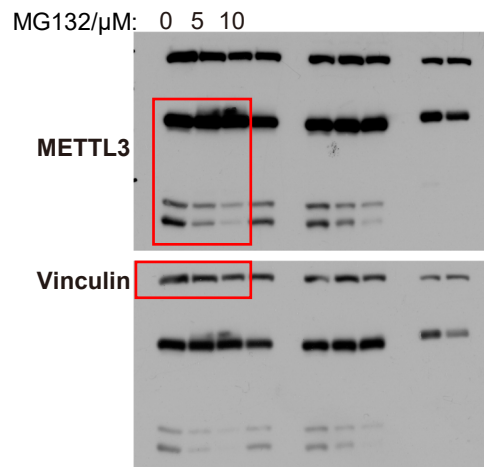

**d**

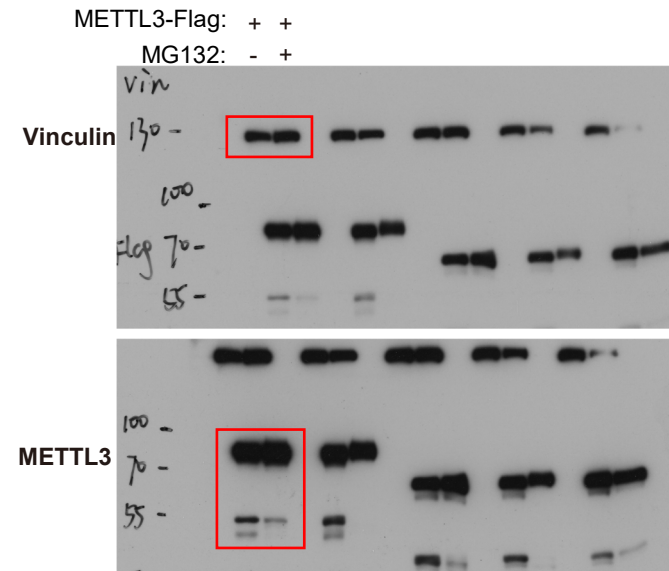

**e**

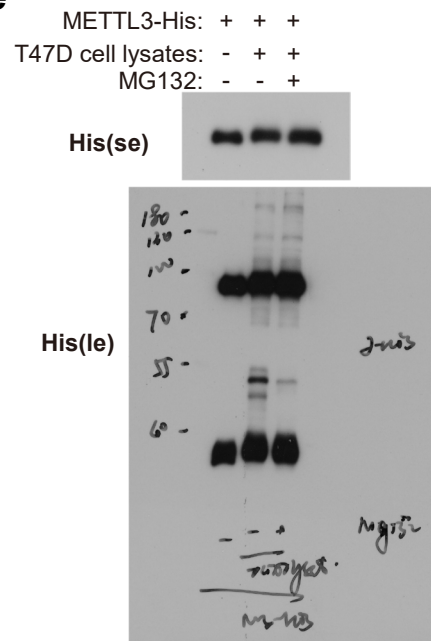

**g**

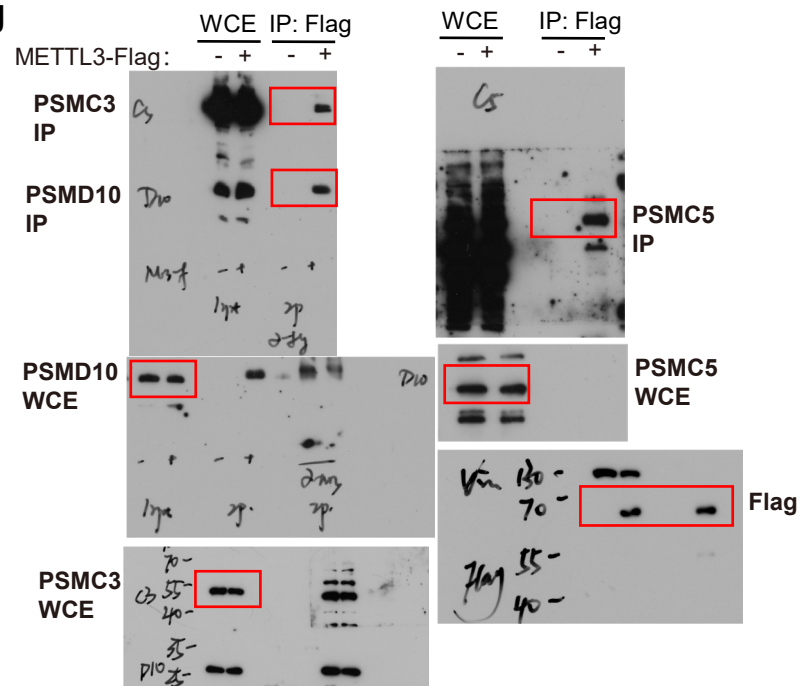

**h**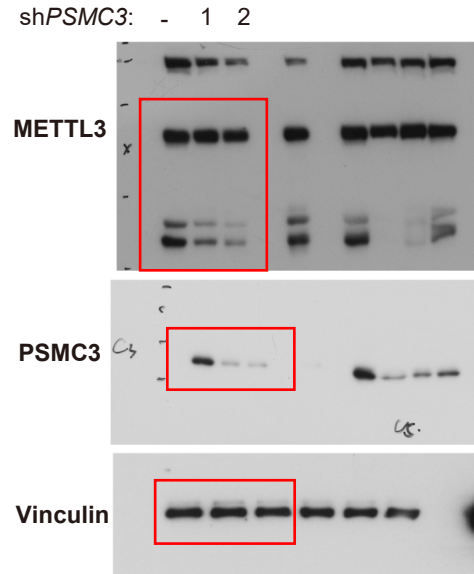**i**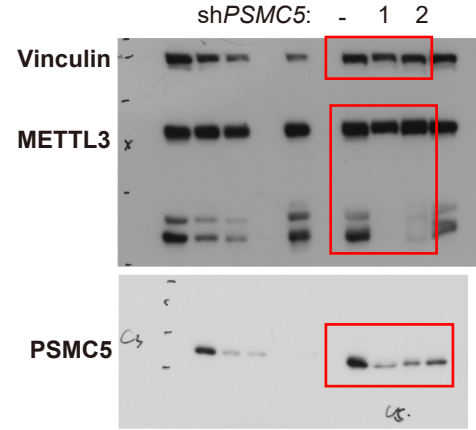**j**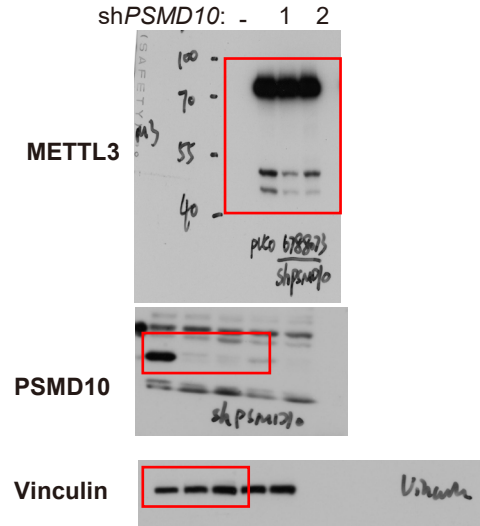**k**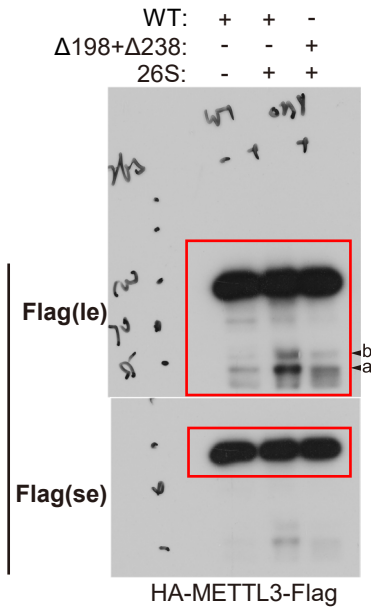**l**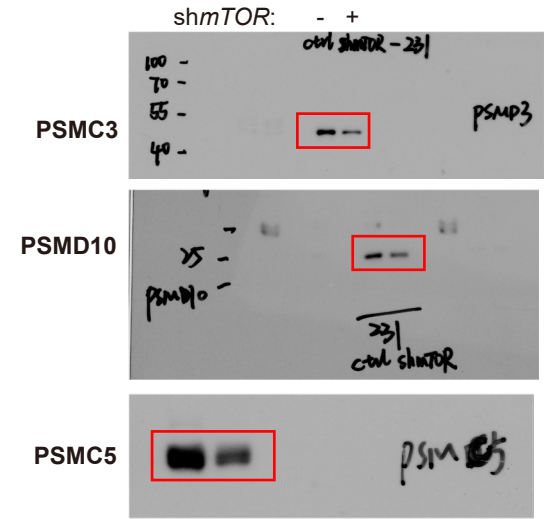**m**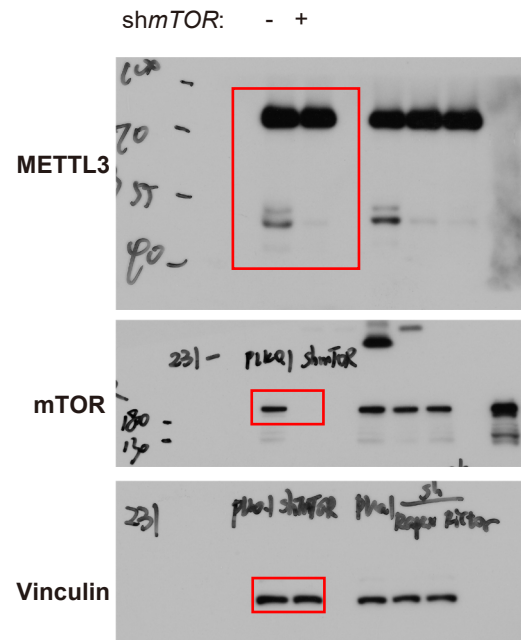**n**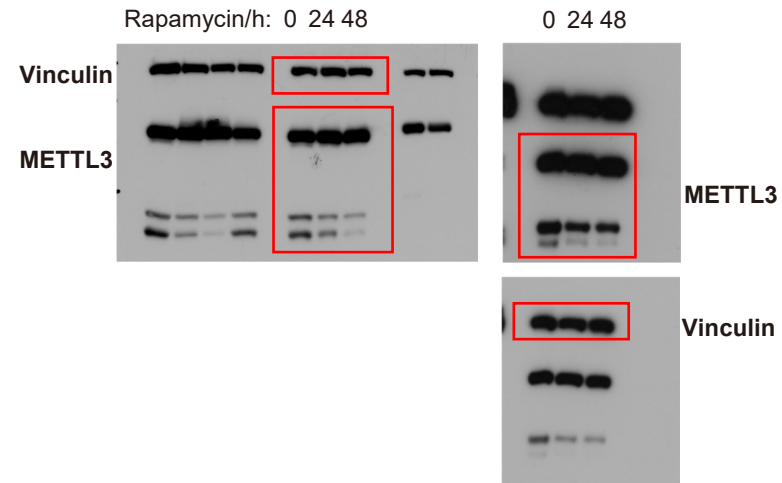**o**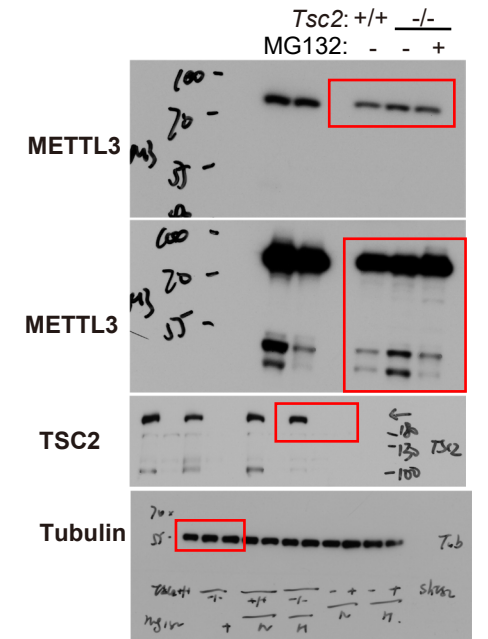

Supplement: elife-87283-fig7-data1.pdf [file elife-87283-fig7-data1.pdf]
