# Supplementary material for: A cleaved METTL3 potentiates the METTL3–WTAP interaction and breast cancer progression
Source: eLife journal article supplement (doi:10.7554/elife.87283), 2023-05-10
Supplement: fig2-data2 [file Related to Figure 2I.xlsx]

## Sheet: Sheet1
sample	Rep1	Rep2	Rep3
WT	185150	197653	189456
Δ198	198061	194663	189932
Δ238	172540	184950	176321
METTL3b	181457	189891	187481
METTL3a	170771	179880	169985
APPA	5270	5313	5521
