# Supplementary material for: A cleaved METTL3 potentiates the METTL3–WTAP interaction and breast cancer progression
Source: eLife journal article supplement (doi:10.7554/elife.87283), 2023-05-10
Supplement: fig2-figsupp2-data2 [file Related to Figure 2-figure supplement 2i.xlsx]

## Sheet: Sheet1
days	sgNC			sgMETTL3+vector			sgMETTL3+WT			sgMETTL3+APPA			sgMETTL3+2MA
0	0.086	0.086	0.086	0.088	0.087	0.085	0.092	0.094	0.099	0.089	0.083	0.085	0.086	0.086	0.09
2	0.1	0.098	0.103	0.095	0.091	0.094	0.111	0.118	0.123	0.095	0.093	0.091	0.104	0.103	0.105
4	0.123	0.117	0.118	0.102	0.095	0.102	0.149	0.15	0.15	0.1	0.106	0.099	0.136	0.139	0.141
6	0.204	0.204	0.188	0.115	0.117	0.12	0.281	0.284	0.261	0.111	0.102	0.107	0.25	0.236	0.215
