# Supplementary material for: A cleaved METTL3 potentiates the METTL3–WTAP interaction and breast cancer progression
Source: eLife journal article supplement (doi:10.7554/elife.87283), 2023-05-10
Supplement: fig5-data2 [file Related to Figure 5M.xlsx]

## Sheet: Sheet1
	shCtrl		shMETTL3+Vec		shMETTL3+WT		shMETTL3+Δ198		shMETTL3+Δ238
m6A signal	0.953994	1.04601	0.562679	0.647362	1.17062	0.958635	0.942339	0.930973	0.487043	0.581145
