# Supplementary material for: A cleaved METTL3 potentiates the METTL3–WTAP interaction and breast cancer progression
Source: eLife journal article supplement (doi:10.7554/elife.87283), 2023-05-10
Supplement: fig5-data2 [file Related to Figure 5N.xlsx]

## Sheet: Sheet1
	WT		Δ238 KI		Δ238 KI +METTL3a
m6A signal	0.94987	1.05013	0.487215	0.448005	0.87938	0.830711
