# Supplementary material for: A cleaved METTL3 potentiates the METTL3–WTAP interaction and breast cancer progression
Source: eLife journal article supplement (doi:10.7554/elife.87283), 2023-05-10
Supplement: fig6-figsupp1-data2 [file Related to Figure 6-figure supplement 1c.xlsx]

## Sheet: Sheet1
	Relative m6A level for figure S5C
	Vec+sgCtrl			Vec			WT			Δ198			Δ238
	1.01163	0.874911	1.11346	0.316242	0.267461	0.255515	1.05456	1.04649	1.02092	1.01114	0.945975	0.941494	0.395517	0.545563	0.482323
